# Supplementary material for: Ecofriendly fabrication of ultrathin colorful fibers via UV-assisted solventless electrospinning
Source: Royal Society of Chemistry journal article supplement (doi:10.1039/c6ra16268a), 2016-01-01
Supplement: c6ra16268a1.pdf [file c6ra16268a1.pdf]

## Supporting Information

### **Ecofriendly fabrication of ultrathin colorful fibers via a UV-assisted solventless electrospinning**

Le Wang,<sup>†a,d</sup> Hong-Wei He,<sup>†a,b</sup> Xu Yan,<sup>a,c</sup> Gui-Feng Yu,<sup>a,b</sup> Xian-Sheng Jia,<sup>a</sup> Jin-Tao Li,<sup>a</sup>

Lin-Hua Xia,<sup>a</sup> Xin Ning,<sup>c</sup> and Yun-Ze Long<sup>\*a,c</sup>

---

<sup>a</sup> Collaborative Innovation Center for Nanomaterials & Optoelectronic Devices, College of Physics, Qingdao University, Qingdao 266071, China. E-mail: [yunze.long@163.com](mailto:yunze.long@163.com) or [yunze.long@qdu.edu.cn](mailto:yunze.long@qdu.edu.cn)

<sup>b</sup> College of Chemical Science & Engineering, Qingdao University, Qingdao 266071, China

<sup>c</sup> Industrial Research Institute of Nonwovens & Technical Textiles, College of Textiles & Clothing, Qingdao University, Qingdao 266071, China

<sup>d</sup> Beijing Engineering Research Center for BioNanotechnology & CAS Key Laboratory for Biological Effects of Nanomaterials and Nanosafety, National Center for NanoScience and Technology, Beijing 100190, China.

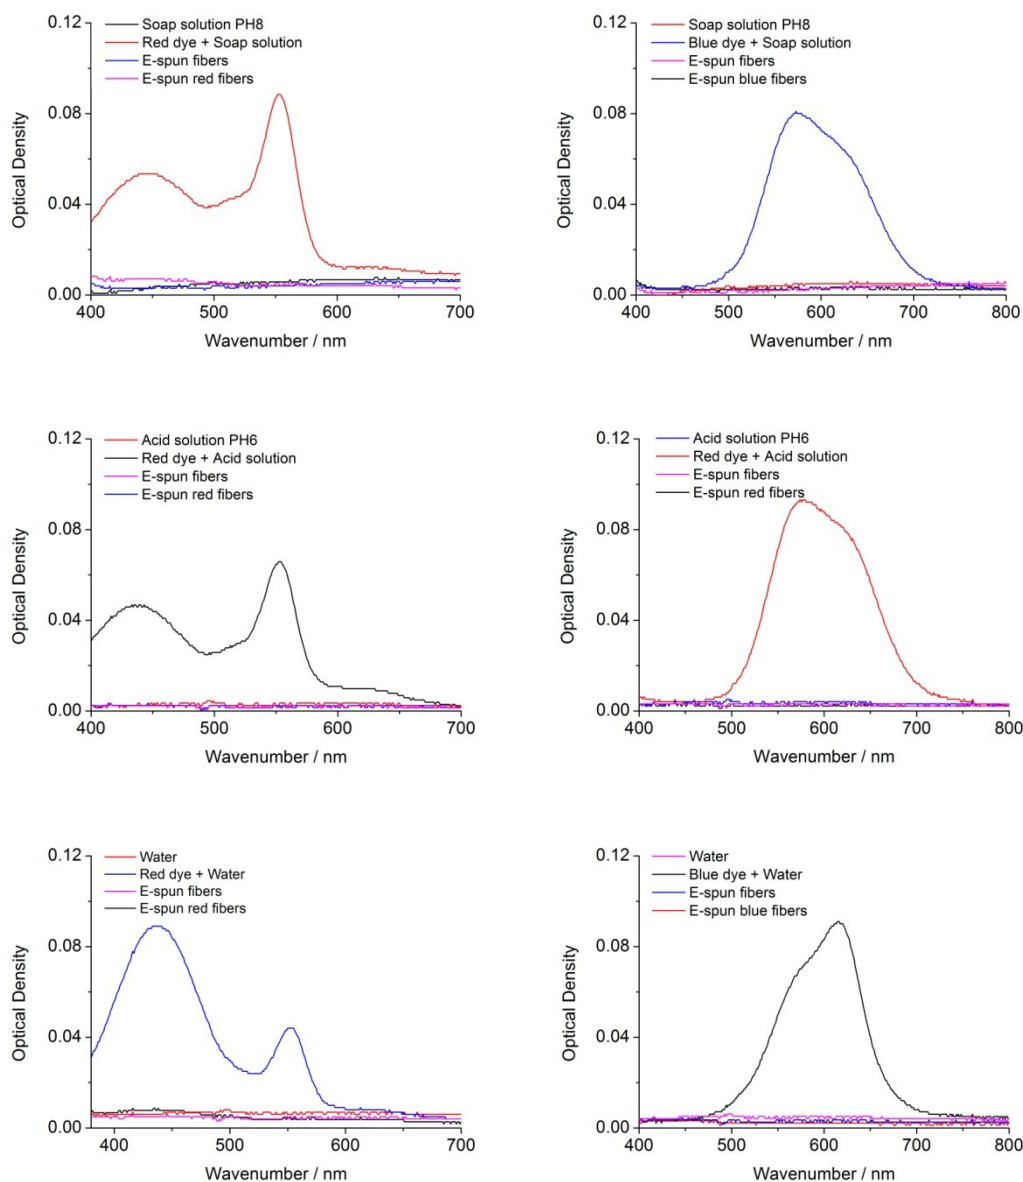

**Fig. S1** UV-Vis spectra of absorbance peak of the dye and standard solutions after soaking of e-spun fibers.

A 0.5 wt% standard soap solution (PH=8) was prepared by dissolving the standard soap in warm water. The standard soap solution was heated to  $40 \pm 2^\circ\text{C}$  in a water bath, and then a piece of e-spun fibers membrane with  $1.0 \text{ cm}^2$  was immersed in the solution. The exhausted standard soap solution was monitored using a UV-Vis spectrophotometer (UV-2450) to characterize the amount of dye release from the membrane. Prior to any spectrophotometric measurements, the UV-Vis cuvette was filled with distilled water and first introduced and recorded as a background.

The absorbance of the dye in the solution was measured in the visible range from 400 to 800 nm, which included the absorbance peak of the dye. UV-vis spectra exhibited the plasma resonance of blue dye around 590 nm (Figure S1). For the measurements, the dye in standard soap solutions after soaking was measured, which was similar to the standard soap solution. Using the same method, the e-spun fibers membrane was soaked in the acid solution (PH=6) and deionized water (PH=7), and the test results were close to the alkaline solution (Figure S1).

**Table S1** Contact angles of e-spun fibrous membranes and coating films with different (five kinds of) colors.

| E-spun membrane | Contact angle / ° | Picture                                                                             | Coating film | Contact angle / ° | Picture                                                                               |
|-----------------|-------------------|-------------------------------------------------------------------------------------|--------------|-------------------|---------------------------------------------------------------------------------------|
| DR-U301         | 107.8             |    | DR-U301      | 94.9              |    |
| R-GNP           | 114.4             |    | R-GNP        | 99.3              |    |
| Y-GNP           | 108.7             |    | Y-GNP        | 96.9              |    |
| B-GNP           | 116.7             |   | B-GNP        | 97.8              |   |
| PI-GNP          | 108.3             |  | PI-GNP       | 95.8              |  |
| PU-GNP          | 107.1             |  | PU-GNP       | 92.2              |  |

Contact angles of the e-spun fibers from DR-U301 doped with different colorful GNP were examined by static water contact angle measurement (DSA100). Deionized water (3.0  $\mu$ L) was automatically dropped onto the flat fibrous membrane. The contact angles indicated the wetting ability of the materials were calculated automatically. As showed in Table S1, the contact angle of the resulting fibrous membrane was higher than that of the corresponding coating film by knife coating, indicating that the dye was embedded into the polymer matrix and was not easy to release.
